# Supplementary material for: Effects of an mHealth Intervention for Pulmonary Tuberculosis Self-management Based on the Integrated Theory of Health Behavior Change: Randomized Controlled Trial
Source: PubMed Central journal article supplement (PMC9335179; doi:10.2196/34277), 2022-07-14
Supplement: publichealth_v8i7e34277_app4.pdf [file publichealth_v8i7e34277_app4.pdf]

**Multimedia Appendix 4.** Topics of health education in the Knowledge and Belief section.

| Knowledge                                                                                                                                                        | Belief                                                                                                         |
|------------------------------------------------------------------------------------------------------------------------------------------------------------------|----------------------------------------------------------------------------------------------------------------|
| <b>Base knowledge</b>                                                                                                                                            | What are the effects on my body, life, family if my disease worsens?                                           |
| What is pulmonary tuberculosis?                                                                                                                                  | Tell patients the development of their disease to relieve doubts and fears.                                    |
| What are common symptoms of pulmonary tuberculosis?                                                                                                              | Tell patients the effectiveness of treatment and build their confidence by offering and analyzing cured cases. |
| How pulmonary tuberculosis spreads?                                                                                                                              | If I keep a positive outlook during therapy, I may get an excellent prognosis.                                 |
| What the difference between pulmonary tuberculosis and COVID-19?                                                                                                 | What difficulties I may be faced with when adopting measures suggested? And how to overcome?                   |
| Can I be cured of pulmonary tuberculosis?                                                                                                                        |                                                                                                                |
| <b>Diet management</b>                                                                                                                                           |                                                                                                                |
| How should I manage my diet during treatment (e.g., nutrition, avoid alcohol, or potential interaction with drugs)                                               |                                                                                                                |
| <b>Hygiene routines</b>                                                                                                                                          |                                                                                                                |
| How can I prevent the spread of pulmonary tuberculosis? (including isolation, respiratory etiquette, handwashing, room ventilation, and disinfection strategies) |                                                                                                                |
| <b>Medication management</b>                                                                                                                                     |                                                                                                                |
| What are the trade names of drugs for medication?                                                                                                                |                                                                                                                |
| How to use drugs properly? (e.g., dose, frequency, or length of therapy)                                                                                         |                                                                                                                |
| What adverse effects may occur and how to deal with them?                                                                                                        |                                                                                                                |
| How to restore medications?                                                                                                                                      |                                                                                                                |
| When should I revisit for checkups?                                                                                                                              |                                                                                                                |
| What conditions may occur if I don't take medicine as directed?                                                                                                  |                                                                                                                |
